# Supplementary material
Source: publisher figshare collection journal article supplement (https://gsapubs.figshare.com/ndownloader/files/23297063)

GSA Data Repository Item 2014118 accompanies Miggins, D.P., Premo, W.R., Snee, L.W., Yeoman, R., Naeser, N.D., Naeser, C.W., and Morton, D.M., 2014, Thermochronology of Cretaceous batholithic rocks in the northern Peninsular Ranges batholith, southern California: Implications for the Late Cretaceous tectonic evolution of southern California, in Morton, D.M., and Miller, F.K., eds., *Peninsular Ranges Batholith, Baja California and Southern California*: GSA Memoir 211, p. 199–261, doi:10.1130/2014.1211(06).

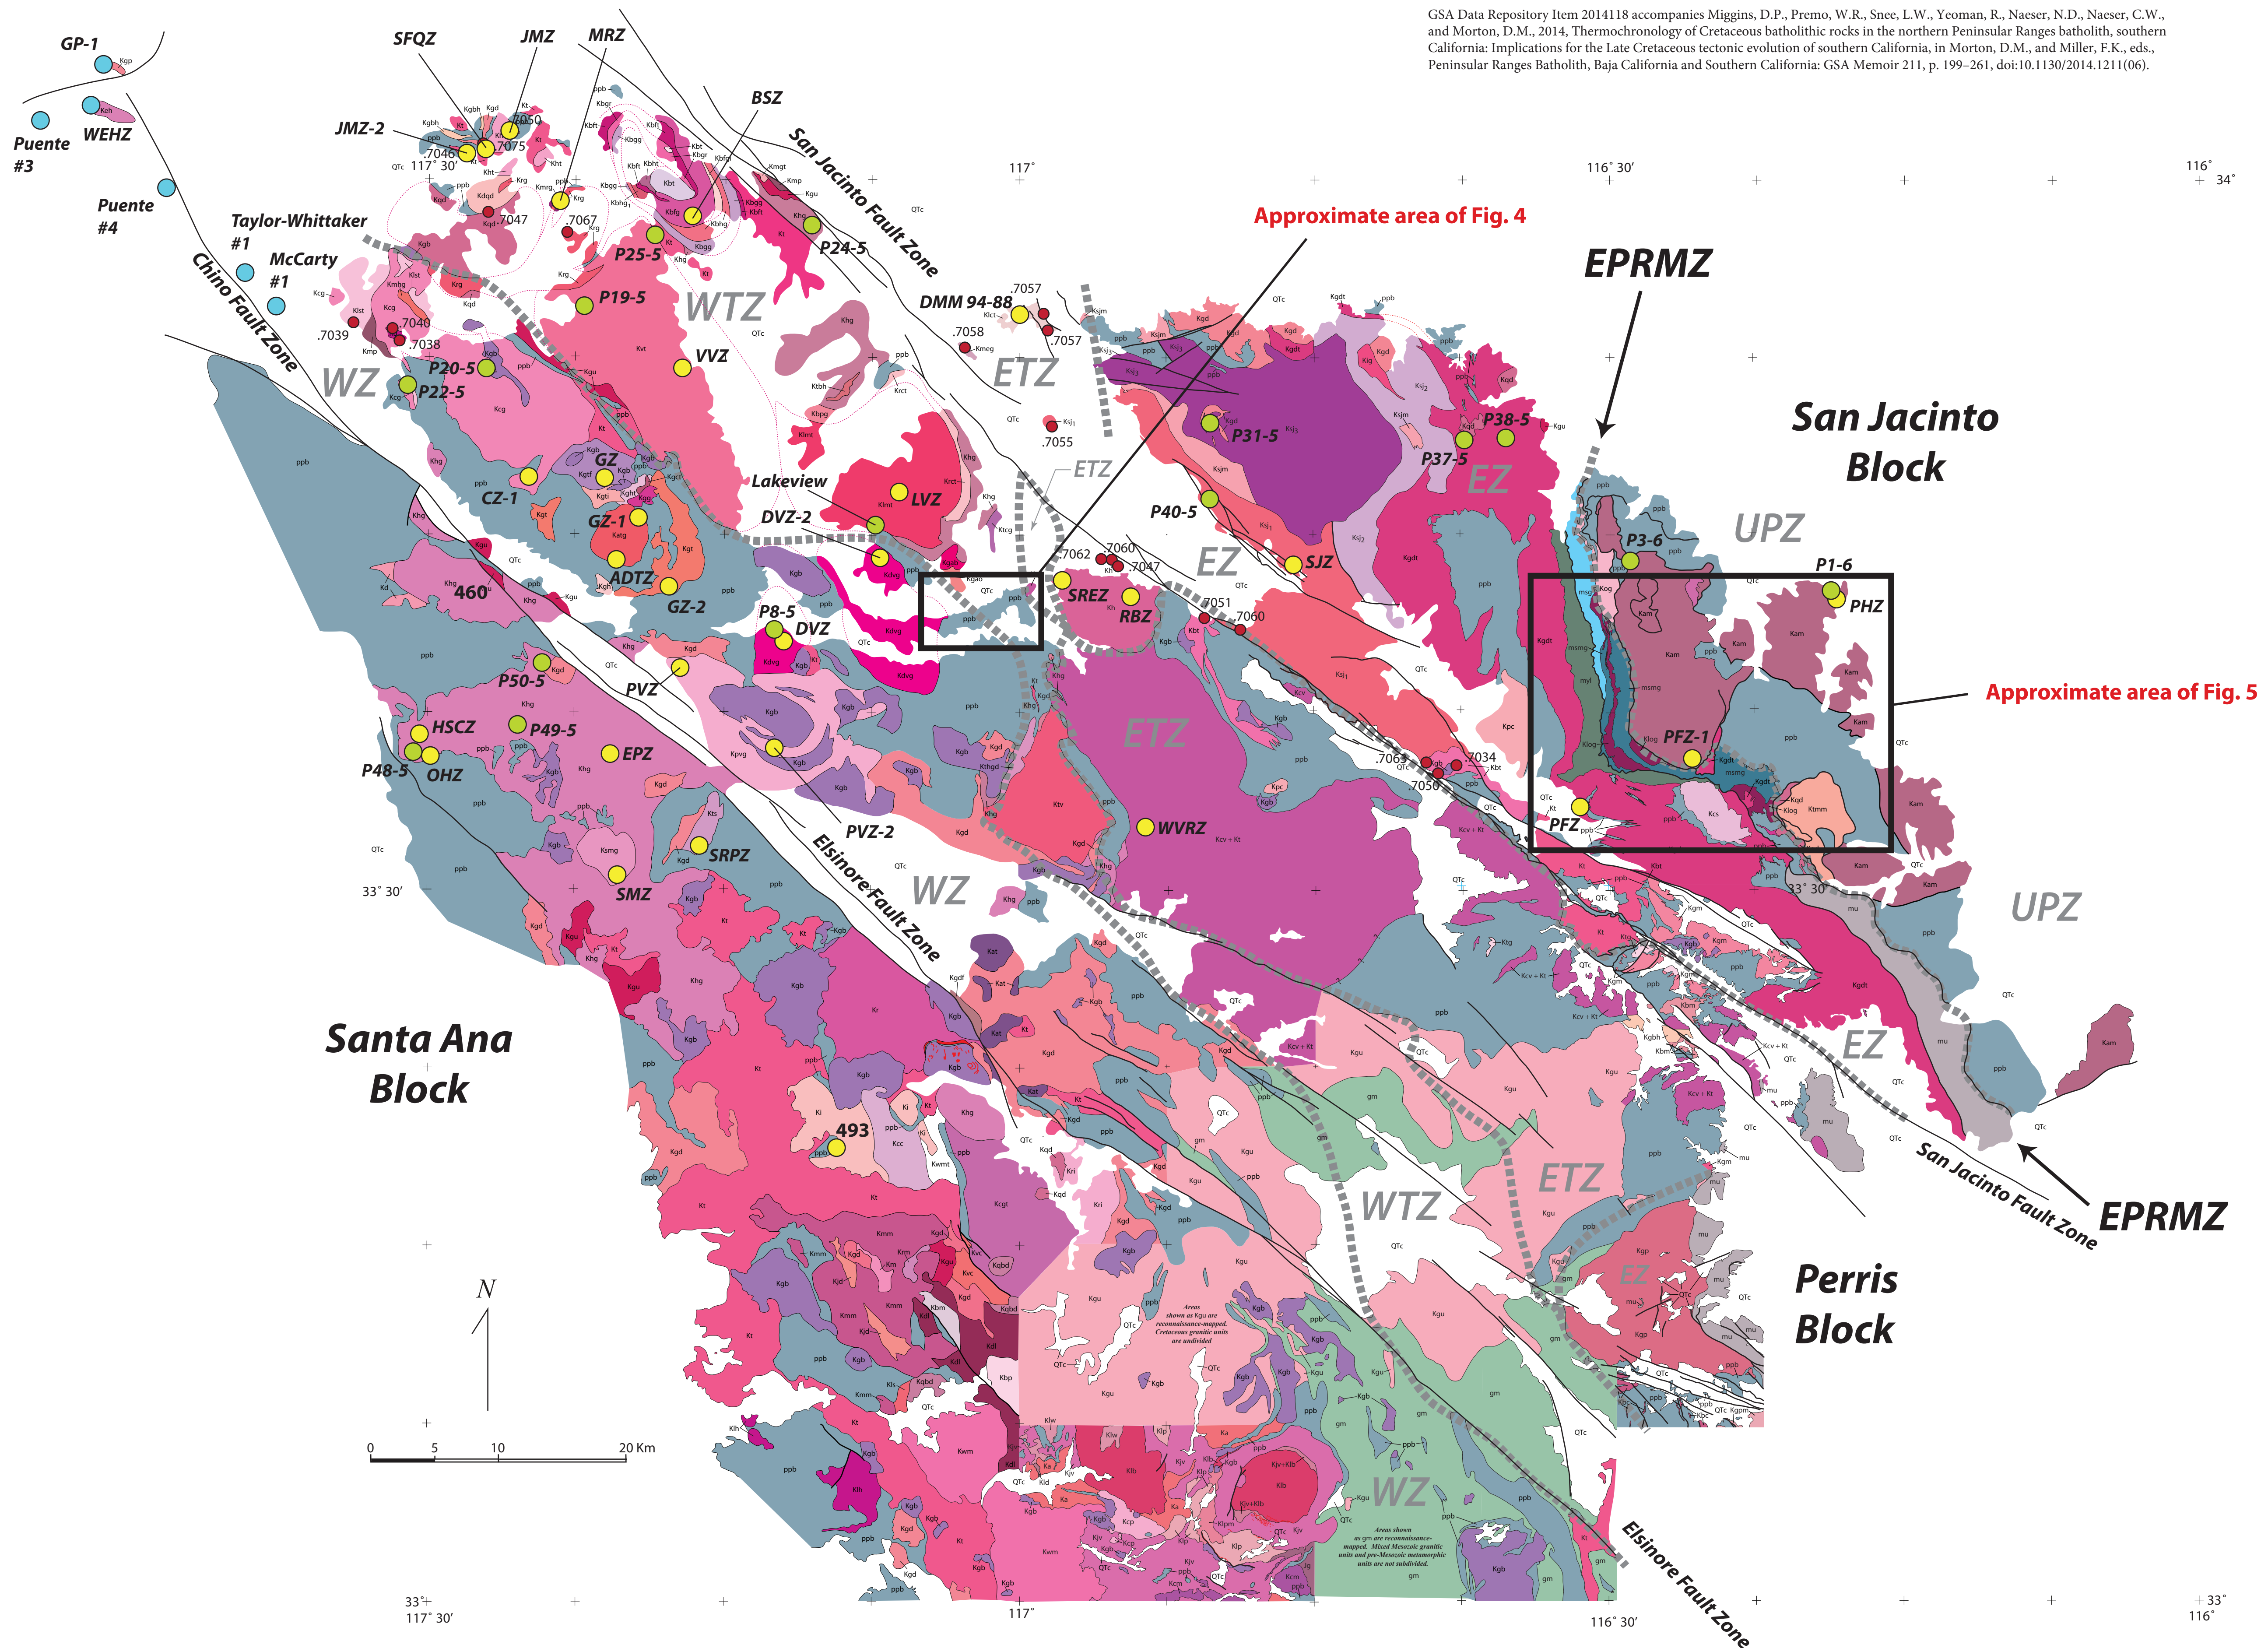

Supplement: Supplementary file 2 [file 23297063]
